# Supplementary material for: Baseline assessment of cervical cancer screening and treatment capacity in 25 counties in Kenya, 2022
Source: PubMed Central journal article supplement (PMC11249718; doi:10.3389/fonc.2024.1371529), 2024-07-02
Supplement: DataSheet_3.pdf [file DataSheet_3.pdf]

## Cervical Cancer Facility Baseline Assessment

| Field                | Question                                                                                                                                                                                          | Answer            |
|----------------------|---------------------------------------------------------------------------------------------------------------------------------------------------------------------------------------------------|-------------------|
| General Information  |                                                                                                                                                                                                   |                   |
| name (required)      | Name of facility incharge                                                                                                                                                                         |                   |
| tel (required)       | Telephone<br>Format: 7xxxxxxx                                                                                                                                                                     |                   |
| email (required)     | Email                                                                                                                                                                                             |                   |
| date                 | Date of supervision                                                                                                                                                                               |                   |
| superteam            | Supervision Team Members(Format:Name-Designation)<br>Hint:Grace Wanjiku-Medical Officer                                                                                                           |                   |
| super1               | 1                                                                                                                                                                                                 |                   |
| super2               | 2                                                                                                                                                                                                 |                   |
| super3               | 3                                                                                                                                                                                                 |                   |
| respo.               | Respondents(Format:Name-Designation)<br>Hint:Tom Oduor-Nurse                                                                                                                                      |                   |
| respo1               | 1                                                                                                                                                                                                 |                   |
| respo2               | 2                                                                                                                                                                                                 |                   |
| respo3               | 3                                                                                                                                                                                                 |                   |
| County (required)    | Please select your County                                                                                                                                                                         | County County     |
| Sub (required)       | Please select the name of your Sub-County                                                                                                                                                         | Sub Sub           |
| Facility (required)  | Please select the name of your facility                                                                                                                                                           | Facility Facility |
| ftier (required)     | Facility Level Tier                                                                                                                                                                               | 1 Level 1         |
|                      |                                                                                                                                                                                                   | 2 Level 2         |
|                      |                                                                                                                                                                                                   | 3 Level 3         |
|                      |                                                                                                                                                                                                   | 4 Level 4         |
|                      |                                                                                                                                                                                                   | 5 Level 5         |
|                      |                                                                                                                                                                                                   | 6 Level 6         |
| ownership (required) | Facility Ownership                                                                                                                                                                                | 1 GOK             |
|                      |                                                                                                                                                                                                   | 2 Private         |
|                      |                                                                                                                                                                                                   | 3 NGO             |
|                      |                                                                                                                                                                                                   | 4 FBO             |
| wrapop (required)    | Facility Catchment Population(WRA)                                                                                                                                                                |                   |
| note1                | The following areas will be assessed:Service Availability,Inputs and Processes                                                                                                                    |                   |
| Service Availability |                                                                                                                                                                                                   |                   |
| serv1 (required)     | Does the facility service charter include provision of cervical cancer screening and treatment?<br>Check service charter and confirm the specific services indicated...                           | 1 Yes             |
|                      |                                                                                                                                                                                                   | 0 No              |
|                      |                                                                                                                                                                                                   | 3 To be updated   |
| serv2 (required)     | What is the indicated waiting time?<br>Hint:Indicate waiting time in minutes e.g 10 minutes                                                                                                       |                   |
| serv3                | Does this facility provide any cervical cancer screening services?<br>Select yes if they provide at least one service                                                                             | 1 Yes             |
|                      |                                                                                                                                                                                                   | 0 No              |
| serv3a               | Does this facility provide any cervical cancer treatment services?<br>Select yes if they provide at least one service                                                                             | 1 Yes             |
|                      |                                                                                                                                                                                                   | 0 No              |
| note2                | <br>Please swipe left to select the cervical cancer screening and treatment services currently being provided. |                   |
| Services Provided    |                                                                                                                                                                                                   |                   |
| labels               | Service                                                                                                                                                                                           | 1 Yes             |
|                      |                                                                                                                                                                                                   | 0 No              |
| cyts (required)      | Cytology(Sample Collection)                                                                                                                                                                       | 1 Yes             |
|                      |                                                                                                                                                                                                   | 0 No              |
| cytp (required)      | Cytology(Processing)                                                                                                                                                                              | 1 Yes             |
|                      |                                                                                                                                                                                                   | 0 No              |
| hpvs (required)      | HPV Test(Sample Collection)                                                                                                                                                                       | 1 Yes             |
|                      |                                                                                                                                                                                                   | 0 No              |
| hpvp (required)      | HPV Test( Processing)                                                                                                                                                                             | 1 Yes             |
|                      |                                                                                                                                                                                                   | 0 No              |
| via (required)       | VIA                                                                                                                                                                                               | 1 Yes             |
|                      |                                                                                                                                                                                                   | 0 No              |
| vili (required)      | VILI                                                                                                                                                                                              | 1 Yes             |
|                      |                                                                                                                                                                                                   | 0 No              |

| Field                      | Question                              | Answer           |
|----------------------------|---------------------------------------|------------------|
| cry (required)             | Cryotherapy                           | 1 Yes            |
|                            |                                       | 0 No             |
| sva (required)             | Single Visit Approach(Screen & Treat) | 1 Yes            |
|                            |                                       | 0 No             |
| leep (required)            | LEEP                                  | 1 Yes            |
|                            |                                       | 0 No             |
| col (required)             | Colposcopy                            | 1 Yes            |
|                            |                                       | 0 No             |
| bio (required)             | Biopsy                                | 1 Yes            |
|                            |                                       | 0 No             |
| endo (required)            | Endocervical Curettage                | 1 Yes            |
|                            |                                       | 0 No             |
| hist (required)            | Histology/Pathology                   | 1 Yes            |
|                            |                                       | 0 No             |
| ther (required)            | Thermoablation                        | 1 Yes            |
|                            |                                       | 0 No             |
| Place of Service Provision |                                       |                  |
| labels2                    | Place of Service Provision            | 1 MCH            |
|                            |                                       | 2 CCC            |
|                            |                                       | 3 Gynae Clinic   |
|                            |                                       | 4 Theatre Clinic |
|                            |                                       | 5 Lab            |
| cyts2 (required)           | Cytology(Sample Collection)           | 1 MCH            |
|                            |                                       | 2 CCC            |
|                            |                                       | 3 Gynae Clinic   |
|                            |                                       | 4 Theatre Clinic |
|                            |                                       | 5 Lab            |
| cytp2 (required)           | Cytology(Processing)                  | 1 MCH            |
|                            |                                       | 2 CCC            |
|                            |                                       | 3 Gynae Clinic   |
|                            |                                       | 4 Theatre Clinic |
|                            |                                       | 5 Lab            |
| hpvs2 (required)           | HPV Test(Sample Collection)           | 1 MCH            |
|                            |                                       | 2 CCC            |
|                            |                                       | 3 Gynae Clinic   |
|                            |                                       | 4 Theatre Clinic |
|                            |                                       | 5 Lab            |
| hpvp2 (required)           | HPV Test( Processing)                 | 1 MCH            |
|                            |                                       | 2 CCC            |
|                            |                                       | 3 Gynae Clinic   |
|                            |                                       | 4 Theatre Clinic |
|                            |                                       | 5 Lab            |
| via2 (required)            | VIA                                   | 1 MCH            |
|                            |                                       | 2 CCC            |
|                            |                                       | 3 Gynae Clinic   |
|                            |                                       | 4 Theatre Clinic |
|                            |                                       | 5 Lab            |
| vili2 (required)           | VILI                                  | 1 MCH            |
|                            |                                       | 2 CCC            |
|                            |                                       | 3 Gynae Clinic   |
|                            |                                       | 4 Theatre Clinic |
|                            |                                       | 5 Lab            |
| cry2 (required)            | Cryotherapy                           | 1 MCH            |
|                            |                                       | 2 CCC            |
|                            |                                       | 3 Gynae Clinic   |
|                            |                                       | 4 Theatre Clinic |
|                            |                                       | 5 Lab            |

| Field                 | Question                                                                                         | Answer                                                                    |
|-----------------------|--------------------------------------------------------------------------------------------------|---------------------------------------------------------------------------|
| sva2 (required)       | Single Visit Approach(Screen & Treat)                                                            | 1 MCH<br>2 CCC<br>3 Gynae Clinic<br>4 Theatre Clinic<br>5 Lab             |
| leep2 (required)      | LEEP                                                                                             | 1 MCH<br>2 CCC<br>3 Gynae Clinic<br>4 Theatre Clinic<br>5 Lab             |
| col2 (required)       | Colposcopy                                                                                       | 1 MCH<br>2 CCC<br>3 Gynae Clinic<br>4 Theatre Clinic<br>5 Lab             |
| bio2 (required)       | Biopsy                                                                                           | 1 MCH<br>2 CCC<br>3 Gynae Clinic<br>4 Theatre Clinic<br>5 Lab             |
| endo2 (required)      | Endocervical Curettage                                                                           | 1 MCH<br>2 CCC<br>3 Gynae Clinic<br>4 Theatre Clinic<br>5 Lab             |
| hist2 (required)      | Histology/Pathology                                                                              | 1 MCH<br>2 CCC<br>3 Gynae Clinic<br>4 Theatre Clinic<br>5 Lab             |
| ther2 (required)      | Thermoablation                                                                                   | 1 MCH<br>2 CCC<br>3 Gynae Clinic<br>4 Theatre Clinic<br>5 Lab             |
| Facility Readiness    |                                                                                                  |                                                                           |
| doc (required)        | Number of medical officers in health facility                                                    |                                                                           |
| doccax (required)     | Number of medical officers trained in cervical cancer screening and treatment                    |                                                                           |
| docdeplo              | Number of medical officers trained and deployed in cervical cancer screening and treatment area  |                                                                           |
| doctrain (required)   | Type of training                                                                                 | 1 Pre-Service Training<br>2 In-Service Training(OJT)<br>3 Formal Training |
| nurse (required)      | Number of nurses in health facility                                                              |                                                                           |
| nursecax (required)   | Number of nurses trained in cervical cancer screening and treatment                              |                                                                           |
| nursedeplo (required) | Number of trained nurses deployed in the cervical cancer screening and treatment area            |                                                                           |
| nursetrain (required) | Type of training                                                                                 | 1 Pre-Service Training<br>2 In-Service Training(OJT)<br>3 Formal Training |
| co (required)         | Number of clinical officers in health facility                                                   |                                                                           |
| cocax (required)      | Number of clinical officers trained in cervical cancer screening and treatment                   |                                                                           |
| codeplo (required)    | Number of clinical officers trained and deployed in cervical cancer screening and treatment area |                                                                           |
| cotrain (required)    | Type of training                                                                                 | 1 Pre-Service Training<br>2 In-Service Training(OJT)<br>3 Formal Training |
| labtech (required)    | Number of lab.techs in health facility                                                           |                                                                           |
| labtechcax (required) | Number of lab.techs trained in cervical cancer screening and treatment                           |                                                                           |
| gyn (required)        | Number of gynaecologist in health facility                                                       |                                                                           |
| gyncax (required)     | Number of gynaecologists trained in cervical cancer screening and treatment                      |                                                                           |
| gyndeplo (required)   | Number of gynaecologists trained and deployed in cervical cancer screening and treatment area    |                                                                           |
| path (required)       | Number of pathologists in health facility                                                        |                                                                           |

| Field                      | Question                                                                                                                                                                                     | Answer                                |
|----------------------------|----------------------------------------------------------------------------------------------------------------------------------------------------------------------------------------------|---------------------------------------|
| pathcax (required)         | Number of pathologists trained in cervical cancer screening and treatment                                                                                                                    |                                       |
| cyt (required)             | Number of cytologist in health facility                                                                                                                                                      |                                       |
| cytcax (required)          | Number of cytologists trained in cervical cancer screening and treatment                                                                                                                     |                                       |
| histo (required)           | Number of histotechnicians in health facility                                                                                                                                                |                                       |
| histcax (required)         | Number of histotechnicians trained in cervical cancer screening and treatment                                                                                                                |                                       |
| facility1                  |                                                                                                                                                                                              |                                       |
| comms (required)           | Do you employ community strategy (involving PHOs,CHVs) in the implementation of cervical cancer screening and treatment activities in your facility?                                         | 1 Yes                                 |
|                            |                                                                                                                                                                                              | 0 No                                  |
| facility2                  |                                                                                                                                                                                              |                                       |
| noPHOs (required)          | Number of PHOs attached to the facility                                                                                                                                                      |                                       |
| noCHVs (required)          | Number of CHVs attached to the facility                                                                                                                                                      |                                       |
| pho (required)             | Are PHOs and CHVs attached to your facility sensitized on cervical cancer screening and treatment?                                                                                           | 1 Yes                                 |
|                            |                                                                                                                                                                                              | 0 No                                  |
| facility3                  |                                                                                                                                                                                              |                                       |
| path1 (required)           | Does the facility offer cervical cancer pathology services?                                                                                                                                  | 1 Yes                                 |
|                            |                                                                                                                                                                                              | 0 No                                  |
| facility4                  |                                                                                                                                                                                              |                                       |
| path1a (required)          | Where are the cervical cancer pathology samples processed?                                                                                                                                   | 1 Processed at the facility LAB       |
|                            |                                                                                                                                                                                              | 2 Referred to an external LAB         |
| facility5                  |                                                                                                                                                                                              |                                       |
| paps1 (required)           | Where are the cervical cancer pathological (PAP smear) samples referred to ?                                                                                                                 | 1 Private LAB                         |
|                            |                                                                                                                                                                                              | 2 Private referral LAB                |
|                            |                                                                                                                                                                                              | 3 Public referral county facility LAB |
|                            |                                                                                                                                                                                              | 4 Public referral national LAB        |
|                            |                                                                                                                                                                                              | 5 Other                               |
| facility6                  |                                                                                                                                                                                              |                                       |
| referral (required)        | Does the facility have a formal arrangement with the referral facility ?                                                                                                                     | 1 Yes                                 |
|                            |                                                                                                                                                                                              | 0 No                                  |
| paps2 (required)           | Do you refer ;                                                                                                                                                                               | 1 Sample Only                         |
|                            |                                                                                                                                                                                              | 2 Client together with the sample     |
| cacxcost (required)        | How much does it cost to process a cervical cancer sample ?<br>KSHS.                                                                                                                         |                                       |
| cacxcost1 (required)       | Who bears the cost of pathology?                                                                                                                                                             | 1 Client                              |
|                            |                                                                                                                                                                                              | 2 Facility                            |
|                            |                                                                                                                                                                                              | 3 Cost Sharing                        |
|                            |                                                                                                                                                                                              | 4 Other                               |
| PAPTAT (required)          | What is the turnaround time for PAP smear results?                                                                                                                                           | 1 < 2 weeks                           |
|                            |                                                                                                                                                                                              | 2 2 to 4 weeks                        |
|                            |                                                                                                                                                                                              | 3 > 4 weeks                           |
| Availability of Guidelines |                                                                                                                                                                                              |                                       |
| guide1 (required)          | <br>Does the facility have the current national cervical cancer screening and treatment guidelines(2018)? | 1 Yes                                 |
|                            |                                                                                                                                                                                              | 0 No                                  |
| Infrastructure             |                                                                                                                                                                                              |                                       |
| infra1 (required)          | Is there a space/room available for cervical cancer screening services ?                                                                                                                     | 1 Yes                                 |
|                            |                                                                                                                                                                                              | 0 No                                  |
| Infrastructure             |                                                                                                                                                                                              |                                       |
| infra2 (required)          | Where can such a room be established?                                                                                                                                                        |                                       |
| Screening Equipment/Items  |                                                                                                                                                                                              |                                       |
| labels4                    | Item Availability                                                                                                                                                                            | 1 Yes                                 |
|                            |                                                                                                                                                                                              | 0 No                                  |
| exambed (required)         | Examination Bed                                                                                                                                                                              | 1 Yes                                 |
|                            |                                                                                                                                                                                              | 0 No                                  |
| lights (required)          | Light Source(White Light)                                                                                                                                                                    | 1 Yes                                 |
|                            |                                                                                                                                                                                              | 0 No                                  |
| Current Stock Status       |                                                                                                                                                                                              |                                       |
| labels5                    | Stock Status                                                                                                                                                                                 | 1 Available                           |
|                            |                                                                                                                                                                                              | 2 Out of Stock(< 1 month)             |
|                            |                                                                                                                                                                                              | 3 Out of Stock(> 1 month)             |

| Field | Question | Answer          |
|-------|----------|-----------------|
|       |          | 4 Not Available |

|                     |                               |                                                                                          |
|---------------------|-------------------------------|------------------------------------------------------------------------------------------|
| papskits (required) | Pap Smear Kits                | 1 Available<br>2 Out of Stock(< 1 month)<br>3 Out of Stock(> 1 month)<br>4 Not Available |
| Hpvskits (required) | HPV Screening Kits            | 1 Available<br>2 Out of Stock(< 1 month)<br>3 Out of Stock(> 1 month)<br>4 Not Available |
| acid (required)     | 3-5% Acetic Acid/Vinegar      | 1 Available<br>2 Out of Stock(< 1 month)<br>3 Out of Stock(> 1 month)<br>4 Not Available |
| iod (required)      | Lugols Iodine                 | 1 Available<br>2 Out of Stock(< 1 month)<br>3 Out of Stock(> 1 month)<br>4 Not Available |
| cwool (required)    | Applicator Sticks/Cotton Wool | 1 Available<br>2 Out of Stock(< 1 month)<br>3 Out of Stock(> 1 month)<br>4 Not Available |
| gloves (required)   | Clean Gloves                  | 1 Available<br>2 Out of Stock(< 1 month)<br>3 Out of Stock(> 1 month)<br>4 Not Available |
| dbucket (required)  | Decontamination Bucket        | 1 Available<br>2 Out of Stock(< 1 month)<br>3 Out of Stock(> 1 month)<br>4 Not Available |
| sharps (required)   | Sharps Container              | 1 Available<br>2 Out of Stock(< 1 month)<br>3 Out of Stock(> 1 month)<br>4 Not Available |
| bins (required)     | Disposal Bins(Color coded)    | 1 Available<br>2 Out of Stock(< 1 month)<br>3 Out of Stock(> 1 month)<br>4 Not Available |

Treatment of precancerous lesions

|               |                                                               |               |
|---------------|---------------------------------------------------------------|---------------|
| tx (required) | Does this facility provide treatment of precancerous lesions? | 1 Yes<br>0 No |
|---------------|---------------------------------------------------------------|---------------|

Treatment

|                   |                                |                                                                    |
|-------------------|--------------------------------|--------------------------------------------------------------------|
| txtype (required) | Indicate the type of treatment | 1 Cryotherapy<br>2 LEEP<br>3 Thermal Ablation<br>4 Other (specify) |
|-------------------|--------------------------------|--------------------------------------------------------------------|

Treatment

|                   |                                                                                   |                                                                                                               |
|-------------------|-----------------------------------------------------------------------------------|---------------------------------------------------------------------------------------------------------------|
| txcryo (required) | For clients due for pre-cancer treatment in your facility ,when are they treated? | 1 Single Visit Approach(Same Day Treatment)<br>2 Scheduled for a later date<br>3 Referred to another facility |
|-------------------|-----------------------------------------------------------------------------------|---------------------------------------------------------------------------------------------------------------|

Treatment

|             |                                    |  |
|-------------|------------------------------------|--|
| latebooking | Reasons for postponing or referral |  |
| refer1      | 1                                  |  |
| refer2      | 2                                  |  |
| refer3      | 3                                  |  |
| refer4      | 4                                  |  |

Status of the Cryotherapy Unit

|                  |                                                                                                                                                                |               |
|------------------|----------------------------------------------------------------------------------------------------------------------------------------------------------------|---------------|
| cunit (required) | Is the cryotherapy unit functional and in good working condition?<br>Hint:Check if cylinder with gas is available and if it has been used in the last 3 months | 1 Yes<br>0 No |
|------------------|----------------------------------------------------------------------------------------------------------------------------------------------------------------|---------------|

Status of the Cryotherapy Unit

|                                            |                                                                                                                                                                                                                                       |                                                                                                                                                                                                                                                                                                |   |                                           |   |                            |   |                                     |   |                              |   |       |
|--------------------------------------------|---------------------------------------------------------------------------------------------------------------------------------------------------------------------------------------------------------------------------------------|------------------------------------------------------------------------------------------------------------------------------------------------------------------------------------------------------------------------------------------------------------------------------------------------|---|-------------------------------------------|---|----------------------------|---|-------------------------------------|---|------------------------------|---|-------|
| cunitbad<br>Field                          | Why is the cryotherapy unit not functional?<br>Question                                                                                                                                                                               | Answer                                                                                                                                                                                                                                                                                         |   |                                           |   |                            |   |                                     |   |                              |   |       |
| cunitstatus1                               | 1                                                                                                                                                                                                                                     |                                                                                                                                                                                                                                                                                                |   |                                           |   |                            |   |                                     |   |                              |   |       |
| cunitstatus2                               | 2                                                                                                                                                                                                                                     |                                                                                                                                                                                                                                                                                                |   |                                           |   |                            |   |                                     |   |                              |   |       |
| cunitstatus3                               | 3                                                                                                                                                                                                                                     |                                                                                                                                                                                                                                                                                                |   |                                           |   |                            |   |                                     |   |                              |   |       |
| cunitstatus4                               | 4                                                                                                                                                                                                                                     |                                                                                                                                                                                                                                                                                                |   |                                           |   |                            |   |                                     |   |                              |   |       |
| LEEP                                       |                                                                                                                                                                                                                                       |                                                                                                                                                                                                                                                                                                |   |                                           |   |                            |   |                                     |   |                              |   |       |
| txleep (required)                          | What are the pre cancer treatment options for LEEP clients?                                                                                                                                                                           | <table border="1"> <tr> <td>1</td> <td>Single Visit Approach(Same Day Treatment)</td> </tr> <tr> <td>2</td> <td>Scheduled for a later date</td> </tr> <tr> <td>3</td> <td>Referred to another facility</td> </tr> </table>                                                                     | 1 | Single Visit Approach(Same Day Treatment) | 2 | Scheduled for a later date | 3 | Referred to another facility        |   |                              |   |       |
| 1                                          | Single Visit Approach(Same Day Treatment)                                                                                                                                                                                             |                                                                                                                                                                                                                                                                                                |   |                                           |   |                            |   |                                     |   |                              |   |       |
| 2                                          | Scheduled for a later date                                                                                                                                                                                                            |                                                                                                                                                                                                                                                                                                |   |                                           |   |                            |   |                                     |   |                              |   |       |
| 3                                          | Referred to another facility                                                                                                                                                                                                          |                                                                                                                                                                                                                                                                                                |   |                                           |   |                            |   |                                     |   |                              |   |       |
| LEEP                                       |                                                                                                                                                                                                                                       |                                                                                                                                                                                                                                                                                                |   |                                           |   |                            |   |                                     |   |                              |   |       |
| leepref (required)                         | Where are biopsy/LEEP patients referred to?                                                                                                                                                                                           | <table border="1"> <tr> <td>1</td> <td>Private LAB</td> </tr> <tr> <td>2</td> <td>Private referral LAB</td> </tr> <tr> <td>3</td> <td>Public referral county facility LAB</td> </tr> <tr> <td>4</td> <td>Public referral national LAB</td> </tr> <tr> <td>5</td> <td>Other</td> </tr> </table> | 1 | Private LAB                               | 2 | Private referral LAB       | 3 | Public referral county facility LAB | 4 | Public referral national LAB | 5 | Other |
| 1                                          | Private LAB                                                                                                                                                                                                                           |                                                                                                                                                                                                                                                                                                |   |                                           |   |                            |   |                                     |   |                              |   |       |
| 2                                          | Private referral LAB                                                                                                                                                                                                                  |                                                                                                                                                                                                                                                                                                |   |                                           |   |                            |   |                                     |   |                              |   |       |
| 3                                          | Public referral county facility LAB                                                                                                                                                                                                   |                                                                                                                                                                                                                                                                                                |   |                                           |   |                            |   |                                     |   |                              |   |       |
| 4                                          | Public referral national LAB                                                                                                                                                                                                          |                                                                                                                                                                                                                                                                                                |   |                                           |   |                            |   |                                     |   |                              |   |       |
| 5                                          | Other                                                                                                                                                                                                                                 |                                                                                                                                                                                                                                                                                                |   |                                           |   |                            |   |                                     |   |                              |   |       |
| LEEP                                       |                                                                                                                                                                                                                                       |                                                                                                                                                                                                                                                                                                |   |                                           |   |                            |   |                                     |   |                              |   |       |
| leepfollowup (required)                    | Does the facility have a follow up mechanism for referred biopsy/LEEP?                                                                                                                                                                | <table border="1"> <tr> <td>1</td> <td>Yes</td> </tr> <tr> <td>0</td> <td>No</td> </tr> </table>                                                                                                                                                                                               | 1 | Yes                                       | 0 | No                         |   |                                     |   |                              |   |       |
| 1                                          | Yes                                                                                                                                                                                                                                   |                                                                                                                                                                                                                                                                                                |   |                                           |   |                            |   |                                     |   |                              |   |       |
| 0                                          | No                                                                                                                                                                                                                                    |                                                                                                                                                                                                                                                                                                |   |                                           |   |                            |   |                                     |   |                              |   |       |
| LEEP                                       |                                                                                                                                                                                                                                       |                                                                                                                                                                                                                                                                                                |   |                                           |   |                            |   |                                     |   |                              |   |       |
| leepTAT                                    | What is the turn around time for performing biopsy/LEEP in patients unsuitable for cryotherapy/thermocoagulation?                                                                                                                     | <table border="1"> <tr> <td>1</td> <td>Less than 2 weeks</td> </tr> <tr> <td>2</td> <td>More than 2 weeks</td> </tr> </table>                                                                                                                                                                  | 1 | Less than 2 weeks                         | 2 | More than 2 weeks          |   |                                     |   |                              |   |       |
| 1                                          | Less than 2 weeks                                                                                                                                                                                                                     |                                                                                                                                                                                                                                                                                                |   |                                           |   |                            |   |                                     |   |                              |   |       |
| 2                                          | More than 2 weeks                                                                                                                                                                                                                     |                                                                                                                                                                                                                                                                                                |   |                                           |   |                            |   |                                     |   |                              |   |       |
| LEEP                                       |                                                                                                                                                                                                                                       |                                                                                                                                                                                                                                                                                                |   |                                           |   |                            |   |                                     |   |                              |   |       |
| leeplatebkng                               | Reasons for postponing or referral                                                                                                                                                                                                    |                                                                                                                                                                                                                                                                                                |   |                                           |   |                            |   |                                     |   |                              |   |       |
| lrefer1                                    | 1                                                                                                                                                                                                                                     |                                                                                                                                                                                                                                                                                                |   |                                           |   |                            |   |                                     |   |                              |   |       |
| lrefer2                                    | 2                                                                                                                                                                                                                                     |                                                                                                                                                                                                                                                                                                |   |                                           |   |                            |   |                                     |   |                              |   |       |
| lrefer3                                    | 3                                                                                                                                                                                                                                     |                                                                                                                                                                                                                                                                                                |   |                                           |   |                            |   |                                     |   |                              |   |       |
| lrefer4                                    | 4                                                                                                                                                                                                                                     |                                                                                                                                                                                                                                                                                                |   |                                           |   |                            |   |                                     |   |                              |   |       |
| Cervical Cancer Screening & Treatment Data |                                                                                                                                                                                                                                       |                                                                                                                                                                                                                                                                                                |   |                                           |   |                            |   |                                     |   |                              |   |       |
| data1 (required)                           | Does the facility have the latest updated cervical cancer screening and treatment register?                                                                                                                                           | <table border="1"> <tr> <td>1</td> <td>Yes</td> </tr> <tr> <td>0</td> <td>No</td> </tr> </table>                                                                                                                                                                                               | 1 | Yes                                       | 0 | No                         |   |                                     |   |                              |   |       |
| 1                                          | Yes                                                                                                                                                                                                                                   |                                                                                                                                                                                                                                                                                                |   |                                           |   |                            |   |                                     |   |                              |   |       |
| 0                                          | No                                                                                                                                                                                                                                    |                                                                                                                                                                                                                                                                                                |   |                                           |   |                            |   |                                     |   |                              |   |       |
| Data                                       |                                                                                                                                                                                                                                       |                                                                                                                                                                                                                                                                                                |   |                                           |   |                            |   |                                     |   |                              |   |       |
| datacap (required)                         | Is there an alternative way of capturing the data?<br>Hint:e.g black book                                                                                                                                                             | <table border="1"> <tr> <td>1</td> <td>Yes</td> </tr> <tr> <td>0</td> <td>No</td> </tr> </table>                                                                                                                                                                                               | 1 | Yes                                       | 0 | No                         |   |                                     |   |                              |   |       |
| 1                                          | Yes                                                                                                                                                                                                                                   |                                                                                                                                                                                                                                                                                                |   |                                           |   |                            |   |                                     |   |                              |   |       |
| 0                                          | No                                                                                                                                                                                                                                    |                                                                                                                                                                                                                                                                                                |   |                                           |   |                            |   |                                     |   |                              |   |       |
| Cervical Cancer Screening & Treatment Data |                                                                                                                                                                                                                                       |                                                                                                                                                                                                                                                                                                |   |                                           |   |                            |   |                                     |   |                              |   |       |
| notedata                                   |  <p>Refer to the DAR or any alternative book used to capture the data and note the summaries for the last 3 months for the following services.</p> |                                                                                                                                                                                                                                                                                                |   |                                           |   |                            |   |                                     |   |                              |   |       |
| data3 (required)                           | Number of clients who received VIA or VIA/VILI Screening in the last 3 months                                                                                                                                                         |                                                                                                                                                                                                                                                                                                |   |                                           |   |                            |   |                                     |   |                              |   |       |
| data4 (required)                           | Number of clients with positive VIA or VIA/VILI result in the last 3 months                                                                                                                                                           |                                                                                                                                                                                                                                                                                                |   |                                           |   |                            |   |                                     |   |                              |   |       |
| data5 (required)                           | Number of clients who received HPV test in the last 3 months                                                                                                                                                                          |                                                                                                                                                                                                                                                                                                |   |                                           |   |                            |   |                                     |   |                              |   |       |
| data6 (required)                           | Number of clients with positive HPV result in the last 3 months                                                                                                                                                                       |                                                                                                                                                                                                                                                                                                |   |                                           |   |                            |   |                                     |   |                              |   |       |
| data7 (required)                           | Number of clients who received Pap smear in the last 3 months                                                                                                                                                                         |                                                                                                                                                                                                                                                                                                |   |                                           |   |                            |   |                                     |   |                              |   |       |
| data8 (required)                           | Number of clients with positive cytology result in the last 3 months                                                                                                                                                                  |                                                                                                                                                                                                                                                                                                |   |                                           |   |                            |   |                                     |   |                              |   |       |
| data9 (required)                           | Number of HIV positive clients screened in the last 3 months                                                                                                                                                                          |                                                                                                                                                                                                                                                                                                |   |                                           |   |                            |   |                                     |   |                              |   |       |
| data12 (required)                          | Number of clients treated using cryotherapy in the last 3 months                                                                                                                                                                      |                                                                                                                                                                                                                                                                                                |   |                                           |   |                            |   |                                     |   |                              |   |       |
| data14 (required)                          | Number of clients treated using LEEP in the last 3 months                                                                                                                                                                             |                                                                                                                                                                                                                                                                                                |   |                                           |   |                            |   |                                     |   |                              |   |       |
| Infection Prevention and Control           |                                                                                                                                                                                                                                       |                                                                                                                                                                                                                                                                                                |   |                                           |   |                            |   |                                     |   |                              |   |       |
| labelsinf                                  | Infection &Prevention Item                                                                                                                                                                                                            | <table border="1"> <tr> <td>1</td> <td>Yes</td> </tr> <tr> <td>0</td> <td>No</td> </tr> </table>                                                                                                                                                                                               | 1 | Yes                                       | 0 | No                         |   |                                     |   |                              |   |       |
| 1                                          | Yes                                                                                                                                                                                                                                   |                                                                                                                                                                                                                                                                                                |   |                                           |   |                            |   |                                     |   |                              |   |       |
| 0                                          | No                                                                                                                                                                                                                                    |                                                                                                                                                                                                                                                                                                |   |                                           |   |                            |   |                                     |   |                              |   |       |
| water (required)                           | Is running water for handwash available?                                                                                                                                                                                              | <table border="1"> <tr> <td>1</td> <td>Yes</td> </tr> <tr> <td>0</td> <td>No</td> </tr> </table>                                                                                                                                                                                               | 1 | Yes                                       | 0 | No                         |   |                                     |   |                              |   |       |
| 1                                          | Yes                                                                                                                                                                                                                                   |                                                                                                                                                                                                                                                                                                |   |                                           |   |                            |   |                                     |   |                              |   |       |
| 0                                          | No                                                                                                                                                                                                                                    |                                                                                                                                                                                                                                                                                                |   |                                           |   |                            |   |                                     |   |                              |   |       |
| dispbox (required)                         | Are waste disposal bag(s) available?                                                                                                                                                                                                  | <table border="1"> <tr> <td>1</td> <td>Yes</td> </tr> <tr> <td>0</td> <td>No</td> </tr> </table>                                                                                                                                                                                               | 1 | Yes                                       | 0 | No                         |   |                                     |   |                              |   |       |
| 1                                          | Yes                                                                                                                                                                                                                                   |                                                                                                                                                                                                                                                                                                |   |                                           |   |                            |   |                                     |   |                              |   |       |
| 0                                          | No                                                                                                                                                                                                                                    |                                                                                                                                                                                                                                                                                                |   |                                           |   |                            |   |                                     |   |                              |   |       |
| sops (required)                            | Are there standard operating procedures(SOPs)?                                                                                                                                                                                        | <table border="1"> <tr> <td>1</td> <td>Yes</td> </tr> <tr> <td>0</td> <td>No</td> </tr> </table>                                                                                                                                                                                               | 1 | Yes                                       | 0 | No                         |   |                                     |   |                              |   |       |
| 1                                          | Yes                                                                                                                                                                                                                                   |                                                                                                                                                                                                                                                                                                |   |                                           |   |                            |   |                                     |   |                              |   |       |
| 0                                          | No                                                                                                                                                                                                                                    |                                                                                                                                                                                                                                                                                                |   |                                           |   |                            |   |                                     |   |                              |   |       |
| wipes (required)                           | Are hand wipes available?                                                                                                                                                                                                             | <table border="1"> <tr> <td>1</td> <td>Yes</td> </tr> <tr> <td>0</td> <td>No</td> </tr> </table>                                                                                                                                                                                               | 1 | Yes                                       | 0 | No                         |   |                                     |   |                              |   |       |
| 1                                          | Yes                                                                                                                                                                                                                                   |                                                                                                                                                                                                                                                                                                |   |                                           |   |                            |   |                                     |   |                              |   |       |
| 0                                          | No                                                                                                                                                                                                                                    |                                                                                                                                                                                                                                                                                                |   |                                           |   |                            |   |                                     |   |                              |   |       |
| Demand Generation                          |                                                                                                                                                                                                                                       |                                                                                                                                                                                                                                                                                                |   |                                           |   |                            |   |                                     |   |                              |   |       |

| Field                                                        | Question                                                                                                                          | Answer                              |
|--------------------------------------------------------------|-----------------------------------------------------------------------------------------------------------------------------------|-------------------------------------|
| dem (required)                                               | Do you conduct awareness for cervical cancer services to increase demand for screen & treat services?                             | 1 Yes                               |
|                                                              |                                                                                                                                   | 0 No                                |
| Demand Generation                                            |                                                                                                                                   |                                     |
| demand1 (required)                                           | What activities are being conducted to increase demand for the cervical cancer screen and treat services from the community?      | 1 Community Outreaches              |
|                                                              |                                                                                                                                   | 2 Media                             |
|                                                              |                                                                                                                                   | 3 Community Leaders                 |
|                                                              |                                                                                                                                   | 4 Churches                          |
|                                                              |                                                                                                                                   | 5 Community Health Workers          |
|                                                              |                                                                                                                                   | 6 Cancer Awareness Months           |
|                                                              |                                                                                                                                   | 7 Others                            |
| Demand Generation                                            |                                                                                                                                   |                                     |
| notedemand                                                   | Other activities being conducted to ensure community awareness of cervical cancer services and increase demand for those services |                                     |
| reason1.1                                                    | 1                                                                                                                                 |                                     |
| reason1.2                                                    | 2                                                                                                                                 |                                     |
| reason1.3                                                    | 3                                                                                                                                 |                                     |
| reason1.4                                                    | 4                                                                                                                                 |                                     |
| Data                                                         |                                                                                                                                   |                                     |
| jobaids (required)                                           | Are there any cervical cancer job aids in the cervical cancer screen and treat room?                                              | 1 Yes                               |
|                                                              |                                                                                                                                   | 0 No                                |
| ciec (required)                                              | Are there any cervical cancer IEC materials in and around the facility?                                                           | 1 Yes                               |
|                                                              |                                                                                                                                   | 0 No                                |
| Demand Generation                                            |                                                                                                                                   |                                     |
| eduses (required)                                            | Do you conduct educational sessions on cervical cancer?                                                                           | 1 Yes                               |
|                                                              |                                                                                                                                   | 0 No                                |
| Demand                                                       |                                                                                                                                   |                                     |
| esf (required)                                               | What is the frequency of the educational sessions?                                                                                | 1 Daily                             |
|                                                              |                                                                                                                                   | 2 Weekly                            |
|                                                              |                                                                                                                                   | 3 Monthly                           |
| Demand Generation                                            |                                                                                                                                   |                                     |
| healthtalks (required)                                       | Do you conduct health talks on cervical cancer?                                                                                   | 1 Yes                               |
|                                                              |                                                                                                                                   | 0 No                                |
| Demand Generation                                            |                                                                                                                                   |                                     |
| htf (required)                                               | What is the frequency of the health sessions?                                                                                     | 1 Daily                             |
|                                                              |                                                                                                                                   | 2 Weekly                            |
|                                                              |                                                                                                                                   | 3 Monthly                           |
| Demand Generation                                            |                                                                                                                                   |                                     |
| mobnumber (required)                                         | On average how many women are reached during these activities each month?                                                         |                                     |
| healthp (required)                                           | Who carries out/implements health promotion activities in the facility?                                                           | 1 Nurses                            |
|                                                              |                                                                                                                                   | 2 Public Health Officers(PHOs)      |
|                                                              |                                                                                                                                   | 3 Community Health Volunteers(CHVs) |
|                                                              |                                                                                                                                   | 4 Others                            |
| Demand Generation                                            |                                                                                                                                   |                                     |
| notehealthp                                                  | Other health promoters used in demand generation activities                                                                       |                                     |
| reasonhp                                                     | 1                                                                                                                                 |                                     |
| reasonhp1                                                    | 2                                                                                                                                 |                                     |
| reasonhp2                                                    | 3                                                                                                                                 |                                     |
| reasonhp3                                                    | 4                                                                                                                                 |                                     |
| Breast Cancer Facility Assessment                            |                                                                                                                                   |                                     |
| bcancer1 (required)                                          | Does the facility offer breast cancer screening services?                                                                         | 1 Yes                               |
|                                                              |                                                                                                                                   | 0 No                                |
| Breast Cancer Facility Assessment > Breast Cancer Assessment |                                                                                                                                   |                                     |

| Field                                             | Question                                                                                                                                                                                                                                                                                                                                     | Answer                                                                                                                                                                                                                                                                                                                                                |   |                                  |   |                    |   |             |   |                                 |   |                                |   |                        |
|---------------------------------------------------|----------------------------------------------------------------------------------------------------------------------------------------------------------------------------------------------------------------------------------------------------------------------------------------------------------------------------------------------|-------------------------------------------------------------------------------------------------------------------------------------------------------------------------------------------------------------------------------------------------------------------------------------------------------------------------------------------------------|---|----------------------------------|---|--------------------|---|-------------|---|---------------------------------|---|--------------------------------|---|------------------------|
| bcancer2 (required)                               | What is the primary breast cancer screening test in your facility?                                                                                                                                                                                                                                                                           | <table border="1"> <tr><td>1</td><td>Clinical Breast Examination(CBE)</td></tr> <tr><td>2</td><td>Ultrasound(US)</td></tr> <tr><td>3</td><td>Mammography</td></tr> <tr><td>4</td><td>Mammography and CBE(co-testing)</td></tr> <tr><td>5</td><td>Mammography and US(co-testing)</td></tr> <tr><td>6</td><td>CBE and US(co-testing)</td></tr> </table> | 1 | Clinical Breast Examination(CBE) | 2 | Ultrasound(US)     | 3 | Mammography | 4 | Mammography and CBE(co-testing) | 5 | Mammography and US(co-testing) | 6 | CBE and US(co-testing) |
| 1                                                 | Clinical Breast Examination(CBE)                                                                                                                                                                                                                                                                                                             |                                                                                                                                                                                                                                                                                                                                                       |   |                                  |   |                    |   |             |   |                                 |   |                                |   |                        |
| 2                                                 | Ultrasound(US)                                                                                                                                                                                                                                                                                                                               |                                                                                                                                                                                                                                                                                                                                                       |   |                                  |   |                    |   |             |   |                                 |   |                                |   |                        |
| 3                                                 | Mammography                                                                                                                                                                                                                                                                                                                                  |                                                                                                                                                                                                                                                                                                                                                       |   |                                  |   |                    |   |             |   |                                 |   |                                |   |                        |
| 4                                                 | Mammography and CBE(co-testing)                                                                                                                                                                                                                                                                                                              |                                                                                                                                                                                                                                                                                                                                                       |   |                                  |   |                    |   |             |   |                                 |   |                                |   |                        |
| 5                                                 | Mammography and US(co-testing)                                                                                                                                                                                                                                                                                                               |                                                                                                                                                                                                                                                                                                                                                       |   |                                  |   |                    |   |             |   |                                 |   |                                |   |                        |
| 6                                                 | CBE and US(co-testing)                                                                                                                                                                                                                                                                                                                       |                                                                                                                                                                                                                                                                                                                                                       |   |                                  |   |                    |   |             |   |                                 |   |                                |   |                        |
| bcancer3 (required)                               | Are the breast cancer screen-positive individuals actively contacted to ensure compliance with further assessment ?                                                                                                                                                                                                                          | <table border="1"> <tr><td>1</td><td>Yes, systematically</td></tr> <tr><td>2</td><td>No or sporadically</td></tr> <tr><td>3</td><td>Unknown</td></tr> </table>                                                                                                                                                                                        | 1 | Yes, systematically              | 2 | No or sporadically | 3 | Unknown     |   |                                 |   |                                |   |                        |
| 1                                                 | Yes, systematically                                                                                                                                                                                                                                                                                                                          |                                                                                                                                                                                                                                                                                                                                                       |   |                                  |   |                    |   |             |   |                                 |   |                                |   |                        |
| 2                                                 | No or sporadically                                                                                                                                                                                                                                                                                                                           |                                                                                                                                                                                                                                                                                                                                                       |   |                                  |   |                    |   |             |   |                                 |   |                                |   |                        |
| 3                                                 | Unknown                                                                                                                                                                                                                                                                                                                                      |                                                                                                                                                                                                                                                                                                                                                       |   |                                  |   |                    |   |             |   |                                 |   |                                |   |                        |
| bcancer3a (required)                              | Are the individuals with a breast cancer diagnosis actively contacted to ensure compliance with further management ?                                                                                                                                                                                                                         | <table border="1"> <tr><td>1</td><td>Yes, systematically</td></tr> <tr><td>2</td><td>No or sporadically</td></tr> <tr><td>3</td><td>Unknown</td></tr> </table>                                                                                                                                                                                        | 1 | Yes, systematically              | 2 | No or sporadically | 3 | Unknown     |   |                                 |   |                                |   |                        |
| 1                                                 | Yes, systematically                                                                                                                                                                                                                                                                                                                          |                                                                                                                                                                                                                                                                                                                                                       |   |                                  |   |                    |   |             |   |                                 |   |                                |   |                        |
| 2                                                 | No or sporadically                                                                                                                                                                                                                                                                                                                           |                                                                                                                                                                                                                                                                                                                                                       |   |                                  |   |                    |   |             |   |                                 |   |                                |   |                        |
| 3                                                 | Unknown                                                                                                                                                                                                                                                                                                                                      |                                                                                                                                                                                                                                                                                                                                                       |   |                                  |   |                    |   |             |   |                                 |   |                                |   |                        |
| mobileclinic (required)                           | Does the facility have a mobile clinic?                                                                                                                                                                                                                                                                                                      | <table border="1"> <tr><td>1</td><td>Yes</td></tr> <tr><td>0</td><td>No</td></tr> </table>                                                                                                                                                                                                                                                            | 1 | Yes                              | 0 | No                 |   |             |   |                                 |   |                                |   |                        |
| 1                                                 | Yes                                                                                                                                                                                                                                                                                                                                          |                                                                                                                                                                                                                                                                                                                                                       |   |                                  |   |                    |   |             |   |                                 |   |                                |   |                        |
| 0                                                 | No                                                                                                                                                                                                                                                                                                                                           |                                                                                                                                                                                                                                                                                                                                                       |   |                                  |   |                    |   |             |   |                                 |   |                                |   |                        |
| Breast Cancer Facility Assessment > Mobile Clinic |                                                                                                                                                                                                                                                                                                                                              |                                                                                                                                                                                                                                                                                                                                                       |   |                                  |   |                    |   |             |   |                                 |   |                                |   |                        |
| mobilecliniqfreq (required)                       | How often is the mobile clinic used for community outreach for breast cancer screening?                                                                                                                                                                                                                                                      | <table border="1"> <tr><td>1</td><td>Not at all</td></tr> <tr><td>2</td><td>Weekly</td></tr> <tr><td>3</td><td>Monthly</td></tr> <tr><td>4</td><td>Sporadically</td></tr> </table>                                                                                                                                                                    | 1 | Not at all                       | 2 | Weekly             | 3 | Monthly     | 4 | Sporadically                    |   |                                |   |                        |
| 1                                                 | Not at all                                                                                                                                                                                                                                                                                                                                   |                                                                                                                                                                                                                                                                                                                                                       |   |                                  |   |                    |   |             |   |                                 |   |                                |   |                        |
| 2                                                 | Weekly                                                                                                                                                                                                                                                                                                                                       |                                                                                                                                                                                                                                                                                                                                                       |   |                                  |   |                    |   |             |   |                                 |   |                                |   |                        |
| 3                                                 | Monthly                                                                                                                                                                                                                                                                                                                                      |                                                                                                                                                                                                                                                                                                                                                       |   |                                  |   |                    |   |             |   |                                 |   |                                |   |                        |
| 4                                                 | Sporadically                                                                                                                                                                                                                                                                                                                                 |                                                                                                                                                                                                                                                                                                                                                       |   |                                  |   |                    |   |             |   |                                 |   |                                |   |                        |
| bcancerservices (required)                        | Does the facility provide the following services?                                                                                                                                                                                                                                                                                            | <table border="1"> <tr><td>1</td><td>Ultrasound</td></tr> <tr><td>2</td><td>Mammogram</td></tr> <tr><td>3</td><td>CT-Scan</td></tr> <tr><td>4</td><td>Ultra-sound guided biopsies</td></tr> <tr><td>5</td><td>Histo-pathology</td></tr> <tr><td>6</td><td>None</td></tr> </table>                                                                     | 1 | Ultrasound                       | 2 | Mammogram          | 3 | CT-Scan     | 4 | Ultra-sound guided biopsies     | 5 | Histo-pathology                | 6 | None                   |
| 1                                                 | Ultrasound                                                                                                                                                                                                                                                                                                                                   |                                                                                                                                                                                                                                                                                                                                                       |   |                                  |   |                    |   |             |   |                                 |   |                                |   |                        |
| 2                                                 | Mammogram                                                                                                                                                                                                                                                                                                                                    |                                                                                                                                                                                                                                                                                                                                                       |   |                                  |   |                    |   |             |   |                                 |   |                                |   |                        |
| 3                                                 | CT-Scan                                                                                                                                                                                                                                                                                                                                      |                                                                                                                                                                                                                                                                                                                                                       |   |                                  |   |                    |   |             |   |                                 |   |                                |   |                        |
| 4                                                 | Ultra-sound guided biopsies                                                                                                                                                                                                                                                                                                                  |                                                                                                                                                                                                                                                                                                                                                       |   |                                  |   |                    |   |             |   |                                 |   |                                |   |                        |
| 5                                                 | Histo-pathology                                                                                                                                                                                                                                                                                                                              |                                                                                                                                                                                                                                                                                                                                                       |   |                                  |   |                    |   |             |   |                                 |   |                                |   |                        |
| 6                                                 | None                                                                                                                                                                                                                                                                                                                                         |                                                                                                                                                                                                                                                                                                                                                       |   |                                  |   |                    |   |             |   |                                 |   |                                |   |                        |
| endnote                                           |                                                                                                                                                                                                                                                                                                                                              |                                                                                                                                                                                                                                                                                                                                                       |   |                                  |   |                    |   |             |   |                                 |   |                                |   |                        |
| endnote                                           |  <p>Thank you for taking your time to complete this survey. We truly value the information you have provided. The information gathered will be used to highlight areas where we need to focus more attention in implementing cervical cancer program.</p> |                                                                                                                                                                                                                                                                                                                                                       |   |                                  |   |                    |   |             |   |                                 |   |                                |   |                        |
