# Supplementary material for: Baseline assessment of cervical cancer screening and treatment capacity in 25 counties in Kenya, 2022
Source: PubMed Central journal article supplement (PMC11249718; doi:10.3389/fonc.2024.1371529), 2024-07-02
Supplement: DataSheet_4.pdf [file DataSheet_4.pdf]

## Cervical Cancer Lab Assessment

| Field                | Question                                                                                                                                | Answer            |
|----------------------|-----------------------------------------------------------------------------------------------------------------------------------------|-------------------|
| General Information  |                                                                                                                                         |                   |
| name (required)      | Name of facility incharge                                                                                                               |                   |
| tel (required)       | Telephone<br>Format: 7xxxxxxx                                                                                                           |                   |
| email (required)     | Email                                                                                                                                   |                   |
| date                 | Date of supervision                                                                                                                     |                   |
| superteam            | Supervision Team Members(Format:Name-Designation)<br>Hint:Grace Wanjiku-Medical Officer                                                 |                   |
| super1               | 1                                                                                                                                       |                   |
| super2               | 2                                                                                                                                       |                   |
| super3               | 3                                                                                                                                       |                   |
| respo.               | Respondents(Format:Name-Designation)<br>Hint:Tom Oduor-Nurse                                                                            |                   |
| respo1               | 1                                                                                                                                       |                   |
| respo2               | 2                                                                                                                                       |                   |
| respo3               | 3                                                                                                                                       |                   |
| County (required)    | Please select your County                                                                                                               | County County     |
| Sub (required)       | Please select the name of your Sub-County                                                                                               | Sub Sub           |
| Facility (required)  | Please select the name of your facility                                                                                                 | Facility Facility |
| Facility Information |                                                                                                                                         |                   |
| ftier (required)     | Facility Level Tier                                                                                                                     | 1 Level 1         |
|                      |                                                                                                                                         | 2 Level 2         |
|                      |                                                                                                                                         | 3 Level 3         |
|                      |                                                                                                                                         | 4 Level 4         |
|                      |                                                                                                                                         | 5 Level 5         |
|                      |                                                                                                                                         | 6 Level 6         |
| ownership (required) | Facility Ownership                                                                                                                      | 1 GOK             |
|                      |                                                                                                                                         | 2 Private         |
|                      |                                                                                                                                         | 3 NGO             |
|                      |                                                                                                                                         | 4 FBO             |
| wrapop (required)    | Facility Catchment Population(WRA)                                                                                                      |                   |
| General              |                                                                                                                                         |                   |
| gen1 (required)      | Is this facility part of any TWG on laboratory testing?                                                                                 | 1 Yes             |
|                      |                                                                                                                                         | 0 No              |
| General              |                                                                                                                                         |                   |
| mtngfq (required)    | What is the TWG meeting frequency?                                                                                                      | 1 Weekly          |
|                      |                                                                                                                                         | 2 Monthly         |
|                      |                                                                                                                                         | 3 Quarterly       |
|                      |                                                                                                                                         | 4 Semi-Annually   |
|                      |                                                                                                                                         | 5 Annually        |
| General              |                                                                                                                                         |                   |
| tbpartners           | List the current implementing partners for HIV and TB ?                                                                                 |                   |
| p1                   | 1                                                                                                                                       |                   |
| p2                   | 2                                                                                                                                       |                   |
| p3                   | 3                                                                                                                                       |                   |
| p4                   | 4                                                                                                                                       |                   |
| p5                   | 5                                                                                                                                       |                   |
| p6                   | 6                                                                                                                                       |                   |
| p7                   | 7                                                                                                                                       |                   |
| stakeholdrs          | List other key stakeholders in HIV and TB .<br>e.g Community Advocacy Groups                                                            |                   |
| s1                   | 1                                                                                                                                       |                   |
| s2                   | 2                                                                                                                                       |                   |
| s3                   | 3                                                                                                                                       |                   |
| s4                   | 4                                                                                                                                       |                   |
| gen4 (required)      | How many staff are employed at the laboratory?                                                                                          |                   |
| Laboratory Processes |                                                                                                                                         |                   |
| labnote              | This section aims to asses and monitor lab capacity and processes to identify strengths and weaknesses of the laboratory health system. |                   |

| Field                   | Question                                                                                                                       | Answer                              |
|-------------------------|--------------------------------------------------------------------------------------------------------------------------------|-------------------------------------|
| genexpert (required)    | Does your lab have a GeneXpert machine?                                                                                        | 1 Yes                               |
|                         |                                                                                                                                | 0 No                                |
| Platform Utilization    |                                                                                                                                |                                     |
| sub1a (required)        | What is the current GeneXpert utilization?<br>Example: If utilization is 50%,indicate 0.5,if 150%,indicate 1.5                 |                                     |
| Platform Utilization    |                                                                                                                                |                                     |
| sub1b (required)        | Are all your GeneXpert modules in good working conditions?<br>Confirm when the machine was last calibrated.                    | 1 Yes                               |
|                         |                                                                                                                                | 0 No                                |
| sub1c (required)        | Have you experienced any testing backlogs for TB?                                                                              | 1 Yes                               |
|                         |                                                                                                                                | 0 No                                |
| Platform Utilization    |                                                                                                                                |                                     |
| backlog (required)      | What are the causes of the backlog                                                                                             | 1 Stock Outs                        |
|                         |                                                                                                                                | 2 Machine Breakdown                 |
|                         |                                                                                                                                | 3 High volume of samples            |
|                         |                                                                                                                                | 4 Other                             |
| Platform Utilization    |                                                                                                                                |                                     |
| backlogother            | List other causes of TB testing backlogs                                                                                       |                                     |
| other1                  | 1                                                                                                                              |                                     |
| other2                  | 2                                                                                                                              |                                     |
| other3                  | 3                                                                                                                              |                                     |
| other4                  | 4                                                                                                                              |                                     |
| Platform Utilization    |                                                                                                                                |                                     |
| testpriority (required) | How does this facility prioritize testing for TB/HIV patients?                                                                 | 1 Sample tested as soon as received |
|                         |                                                                                                                                | 2 TB samples tested first           |
|                         |                                                                                                                                | 3 EID samples tested first          |
|                         |                                                                                                                                | 4 Other                             |
| Platform Utilization    |                                                                                                                                |                                     |
| prio1                   | List other ways of prioritizing HIV/TB testing                                                                                 |                                     |
| prio2                   | 1                                                                                                                              |                                     |
| prio3                   | 2                                                                                                                              |                                     |
| prio4                   | 3                                                                                                                              |                                     |
| prio5                   | 4                                                                                                                              |                                     |
| prionote                | If the samples received are in excess of machine capacity, what do you do with the excess samples?                             |                                     |
| excess1                 | 1                                                                                                                              |                                     |
| excess2                 | 2                                                                                                                              |                                     |
| excess3                 | 3                                                                                                                              |                                     |
| excess4                 | 4                                                                                                                              |                                     |
| Platform Utilization    |                                                                                                                                |                                     |
| sub2c (required)        | Have you experienced testing backlogs for TB/HIV?                                                                              | 1 Yes                               |
|                         |                                                                                                                                | 0 No                                |
| Platform Utilization    |                                                                                                                                |                                     |
| sub2c1 (required)       | How long was the backlog?                                                                                                      | 1 Less than 1 Week                  |
|                         |                                                                                                                                | 2 More than 1 Week                  |
| sub2d (required)        | How often do high volumes of TB samples cause delays in returning Early Infant Diagnosis and Viral Load (EID/VL) test results? | 1 Often(every 2 weeks)              |
|                         |                                                                                                                                | 2 Rare(every 2 months)              |
|                         |                                                                                                                                | 3 Never                             |
| sub2d1 (required)       | How often do high volumes of EID/VL samples cause delays in returning TB test results?                                         | 1 Often(every 2 weeks)              |
|                         |                                                                                                                                | 2 Rare(every 2 months)              |
|                         |                                                                                                                                | 3 Never                             |
| sub2d2 (required)       | How often do high volumes of POC EID samples cause delays in returning TB test results?                                        | 1 Often(every 2 weeks)              |
|                         |                                                                                                                                | 2 Rare(every 2 months)              |
|                         |                                                                                                                                | 3 Never                             |
| sub2d3 (required)       | How often do machine breakdown cause delays in returning test results?                                                         | 1 Often(monthly)                    |
|                         |                                                                                                                                | 2 Rare(Quartely)                    |
|                         |                                                                                                                                | 3 Never                             |
| sub2d4 (required)       | How often do reagents stock out cause delays in returning test results?                                                        | 1 Often(monthly)                    |
|                         |                                                                                                                                | 2 Rare(Quartely)                    |
|                         |                                                                                                                                | 3 Never                             |
| Sample Referral         |                                                                                                                                |                                     |

| Field                     | Question                                                                     | Answer                                   |
|---------------------------|------------------------------------------------------------------------------|------------------------------------------|
| sample1 (required)        | Does this facility refer TB samples ?                                        | 1 Yes                                    |
|                           |                                                                              | 0 No                                     |
| sample2 (required)        | Does this facility refer EID samples ?                                       | 1 Yes                                    |
|                           |                                                                              | 0 No                                     |
| sample3 (required)        | Does this facility refer VL samples ?                                        | 1 Yes                                    |
|                           |                                                                              | 0 No                                     |
| Sample Referral           |                                                                              |                                          |
| sample123a (required)     | Which facility do you refer to?                                              |                                          |
| samplemode (required)     | What is the transportation mode for TB,EID and VL samples?                   | 1 Courier Service                        |
|                           |                                                                              | 2 Riders                                 |
|                           |                                                                              | 3 HCW Provider                           |
|                           |                                                                              | 4 Ambulance                              |
| transportcost (required)  | Who pays for sample transportation?                                          | 1 Facility                               |
|                           |                                                                              | 2 County                                 |
|                           |                                                                              | 3 Implementing Partner                   |
| sample6                   | What challenges do you face in sample transportation?                        |                                          |
| sample7                   | 1                                                                            |                                          |
| sample8                   | 2                                                                            |                                          |
| sample9                   | 3                                                                            |                                          |
| sample10                  | 4                                                                            |                                          |
| sample11                  | 5                                                                            |                                          |
| Data                      |                                                                              |                                          |
| data1.1 (required)        | Does this facility have an electronic medical records system?                | 1 Yes                                    |
|                           |                                                                              | 0 No                                     |
| Data                      |                                                                              |                                          |
| esystemlist (required)    | Specify the system                                                           | 1 Kenya EMR                              |
|                           |                                                                              | 2 IQ Care                                |
|                           |                                                                              | 3 Other                                  |
| Data                      |                                                                              |                                          |
| esystemother              | List any other electronic medical records system in use                      |                                          |
| emr1                      | 1                                                                            |                                          |
| emr2                      | 2                                                                            |                                          |
| emr3                      | 3                                                                            |                                          |
| emr4                      | 4                                                                            |                                          |
| emr5                      | 5                                                                            |                                          |
| Data                      |                                                                              |                                          |
| inter (required)          | Does the facility have internet?                                             | 1 Yes                                    |
|                           |                                                                              | 0 No                                     |
| Data                      |                                                                              |                                          |
| wifi (required)           | How is internet provided within the lab ?                                    | 1 Fiber                                  |
|                           |                                                                              | 2 Phone Tethering                        |
|                           |                                                                              | 3 Modem                                  |
|                           |                                                                              | 4 WI-FI Hotspot                          |
| Commodity                 |                                                                              |                                          |
| comm1 (required)          | Is there a register to track HPV /Pap Smear screening commodities?           | 1 Yes                                    |
|                           |                                                                              | 0 No                                     |
| comm3 (required)          | Have you ever experienced any stock out of the above mentioned commodities ? | 1 Yes                                    |
|                           |                                                                              | 0 No                                     |
| Commodity                 |                                                                              |                                          |
| stockoutperiod (required) | What was the duration of the stock-out?                                      | 1 Less than 1 Month                      |
|                           |                                                                              | 2 1 Month                                |
|                           |                                                                              | 3 More than 1 Month                      |
| stockrecord (required)    | How did you report for the stock outs?                                       | 1 LIMS System                            |
|                           |                                                                              | 3 Call partners                          |
|                           |                                                                              | 4 Call County Medical Lab.Techs          |
| stock7 (required)         | How did you resolve the stockouts?                                           | 1 Waited for the next scheduled shipment |
|                           |                                                                              | 2 Buffer Stock from Partners             |
|                           |                                                                              | 3 Other                                  |
| Commodity                 |                                                                              |                                          |

| Field         | Question                                               | Answer |
|---------------|--------------------------------------------------------|--------|
| notecommodity | List other ways you were able to resolve the stockouts |        |
| commo1        | 1                                                      |        |
| commo2        | 2                                                      |        |
| commo3        | 3                                                      |        |
| commo4        | 4                                                      |        |
| commo5        | 5                                                      |        |
